# Supplementary material for: Multifaceted interventions to decrease mortality in patients with severe sepsis/septic shock—a quality improvement project
Source: PubMed Central journal article supplement (PMC4614979; doi:10.7717/peerj.1290), 2015-10-20
Supplement: peerj-03-1290-s001.pdf [file peerj-03-1290-s001.pdf]

| Date  | ICU_Admit | ICU_Discha | Age    | Gender (M | PatientHeiç | PatientWei | BMI      |
|-------|-----------|------------|--------|-----------|-------------|------------|----------|
| ##### |           |            |        |           |             |            |          |
| ##### | #####     | #####      | 83.445 | 1         | 155         | 40.8       | 16.98231 |
| ##### | #####     | #####      | 76.082 | 1         | 160         | 60.6       | 23.67188 |
| ##### | #####     | #####      | 88.889 | 1         | 154         | 62.1       | 26.18485 |
| ##### | #####     | #####      | 81.04  | 0         | 157         | 90         | 36.51264 |
| ##### | #####     | #####      | 88.711 | 0         | 168         | 71.1       | 25.19133 |
| ##### | #####     | #####      | 63.314 | 1         | 160         | 58.6       | 22.89063 |
| ##### | #####     | #####      | 63.962 | 1         | 154         | 77.5       | 32.67836 |
| ##### | #####     | #####      | 76.038 | 1         | 165         | 70         | 25.71166 |
| ##### | #####     | #####      | 78.456 | 1         | 179         | 86.8       | 27.09029 |
| ##### | #####     | #####      | 60.667 | 1         | 168         | 94.9       | 33.62387 |
| ##### | #####     | #####      | 74.82  | 0         | 170         | 92.3       | 31.93772 |
| ##### | #####     | #####      | 75.891 | 1         | 163         | 75.9       | 28.56713 |
| ##### | #####     | #####      | 84.829 | 0         | 181         | 74.8       | 22.83203 |
| ##### | #####     | #####      | 59.628 | 0         | 180         | 104.3      | 32.19136 |
| ##### | #####     | #####      | 90.136 | 1         | 160         | 62.6       | 24.45313 |
| ##### | #####     | #####      | 48.747 | 0         | 194         | 104        | 27.63312 |
| ##### | #####     | #####      | 50.007 | 0         | 187         | 87.5       | 25.02216 |
| ##### | #####     | #####      | 62.837 | 0         | 168         | 88         | 31.17914 |
| ##### | #####     | #####      | 72.727 | 0         | 178         | 103.8      | 32.76102 |
| ##### | #####     | #####      | 70.283 | 0         | 164         | 110        | 40.89827 |
| ##### | #####     | #####      | 63.94  | 1         | 147         | 107.7      | 49.84034 |
| ##### | #####     | #####      | 66.3   | 1         | 146         | 63         | 29.55526 |
| ##### | #####     | #####      | 56.046 | 0         | 182         | 126.9      | 38.31059 |
| ##### | #####     | #####      | 78.13  | 0         | 182         | 78.9       | 23.81959 |
| ##### | #####     | #####      | 54.804 | 1         | 199         | 100.4      | 25.3529  |
| ##### | #####     | #####      | 61.253 | 0         | 180         | 126.6      | 39.07407 |
| ##### | #####     | #####      | 62.861 | 1         | 165         | 83.7       | 30.7438  |
| ##### | #####     | #####      | 75.034 | 0         | 170         | 49.7       | 17.19723 |
| ##### | #####     | #####      | 68.104 | 0         | 182         | 84.9       | 25.63096 |
| ##### | #####     | #####      | 59.596 | 0         | 172         | 65.4       | 22.10654 |
| ##### | #####     | #####      | 52.544 | 1         | 167         | 53.2       | 19.07562 |
| ##### | #####     | #####      | 81.116 | 0         | 157         | 90         | 36.51264 |
| ##### | #####     | #####      | 63.324 | 0         | 183         | 67.7       | 20.21559 |
| ##### | #####     | #####      | 73.1   | 1         | 156         | 92.1       | 37.84517 |
| ##### | #####     | #####      | 88.322 | 0         | 164         | 58.1       | 21.60173 |
| ##### | #####     | #####      | 56.27  | 0         | 178         | 106        | 33.45537 |
| ##### | #####     | #####      | 53.73  | 1         | 159         | 75.5       | 29.86432 |
| ##### | #####     | #####      | 58.971 | 1         | 175         | 123.9      | 40.45714 |
| ##### | #####     | #####      | 50.45  | 0         | 187         | 99.5       | 28.45377 |
| ##### | #####     | #####      | 80.077 | 0         | 188         | 95.2       | 26.93526 |
| ##### | #####     | #####      | 58.546 | 0         | 168         | 68.3       | 24.19926 |
| ##### | #####     | #####      | 75.787 | 1         | 160         | 69         | 26.95313 |
| ##### | #####     | #####      | 63.461 | 0         | 183         | 117        | 34.93684 |
| ##### | #####     | #####      | 80.93  | 1         | 147.3       | 55         | 25.34879 |
| ##### | #####     | #####      | 31.904 | 0         |             |            |          |

|       |       |       |         |   |       |       |          |
|-------|-------|-------|---------|---|-------|-------|----------|
| ##### | ##### | ##### | 84.189  | 0 | 175   | 109.2 | 35.65714 |
| ##### | ##### | ##### | 58.089  | 0 | 168   | 161.8 | 57.3271  |
| ##### | ##### | ##### | 45.39   | 1 | 127   | 89.9  | 55.73811 |
| ##### | ##### | ##### | 37.842  | 0 | 186   | 87.3  | 25.23413 |
| ##### | ##### | ##### | 56.935  | 0 | 189   | 198.9 | 55.68153 |
| ##### | ##### | ##### | 75.099  | 0 | 172   | 84.5  | 28.56274 |
| ##### | ##### | ##### | 50.189  | 1 | 177   | 79.9  | 25.50353 |
| ##### | ##### | ##### | 51.479  | 0 | 187   | 125.8 | 35.97472 |
| ##### | ##### | ##### | 89.912  | 1 | 160   | 74.4  | 29.0625  |
| ##### | ##### | ##### | 62.307  | 0 | 193   | 90.9  | 24.40334 |
| ##### | ##### | ##### | 59.553  | 1 | 149   | 78.2  | 35.22364 |
| ##### | ##### | ##### | 82.427  | 1 | 150   | 66.6  | 29.6     |
| ##### | ##### | ##### | 60.348  | 0 | 168   |       |          |
| ##### | ##### | ##### | 66.762  | 1 | 177   | 124.6 | 39.77146 |
| ##### | ##### | ##### | 76.342  | 1 | 162   | 63.7  | 24.27221 |
| ##### | ##### | ##### | 64.775  | 1 | 155   | 101.4 | 42.20604 |
| ##### | ##### | ##### | 88.027  | 1 | 157   | 80.9  | 32.8208  |
| ##### | ##### | ##### | 70.449  | 0 | 165   | 55.3  | 20.31221 |
| ##### | ##### | ##### | 71.216  | 1 | 152   | 63    | 27.26801 |
| ##### | ##### | ##### | 93.844  | 0 | 162   | 72.2  | 27.51105 |
| ##### | ##### | ##### | 71.901  | 1 | 165   | 95    | 34.8944  |
| ##### | ##### | ##### | 54.745  | 0 | 176   | 97.6  | 31.50826 |
| ##### | ##### | ##### | 64.966  | 1 | 155   | 64.5  | 26.84703 |
| ##### | ##### | ##### | 89.439  | 1 | 170   |       |          |
| ##### | ##### | ##### | 106.523 | 0 | 160   | 69.9  | 27.30469 |
| ##### | ##### | ##### | 85.269  | 0 | 177.8 | 88.1  | 27.86842 |
| ##### | ##### | ##### | 80.326  | 0 | 164   | 102.2 | 37.99822 |
| ##### | ##### | ##### | 52.518  | 0 | 180   | 72.1  | 22.25309 |
| ##### | ##### | ##### | 80.698  | 1 | 172   | 49.6  | 16.76582 |
| ##### | ##### | ##### | 38.598  | 1 |       |       |          |
| ##### | ##### | ##### | 79.493  | 0 | 182.9 | 98.8  | 29.53449 |
| ##### | ##### | ##### | 86.153  | 0 | 170   | 90.3  | 31.24567 |
| ##### | ##### | ##### | 64.898  | 1 | 155   | 48.3  | 20.10406 |
| ##### | ##### | ##### | 61.211  | 1 |       |       |          |
| ##### | ##### | ##### | 64.156  | 1 | 156   |       |          |
| ##### | ##### | ##### | 54.055  | 1 |       |       |          |
| ##### | ##### | ##### | 53.092  | 1 | 165   |       |          |
| ##### | ##### | ##### | 79.762  | 0 |       |       |          |
| ##### | ##### | ##### | 86.805  | 1 |       |       |          |
| ##### | ##### | ##### | 24.854  | 1 | 138   |       |          |
| ##### | ##### | ##### | 78.537  | 1 | 154   |       |          |
| ##### | ##### | ##### | 69.989  | 0 | 183   |       |          |
| ##### | ##### | ##### | 60.208  | 1 |       |       |          |
| ##### | ##### | ##### | 67.142  | 0 |       |       |          |
| ##### | ##### | ##### | 43      | 0 |       |       |          |

Admission\_Admitting\_ServiceCod ICU\_Length ICU\_Discha ICU\_Discha Hospital\_A Hospital\_D Hospital\_Lc

|                        |       |         |   |       |       |       |
|------------------------|-------|---------|---|-------|-------|-------|
| MB6B and DIR_ADMIN CCS | 3.37  | DO5D    | 0 | ##### | ##### | 24.04 |
| MB6B and DO3D CCS      | 3.02  | JO3G    | 0 | ##### | ##### | 5.86  |
| MB6B and DO6D CCS      | 1.08  | HOSP DC | 1 | ##### | ##### | 1.67  |
| MB6B and ETU CCS       | 1.22  | DO6D    | 0 | ##### | ##### | 7.1   |
| MB6B and DO3D CCS      | 2.35  | HOSP DC | 1 | ##### | ##### | 9.6   |
| MB6B and DIR_ADMIN CCS | 2.03  | HOSP DC | 1 | ##### | ##### | 2.03  |
| MB6B and ETU CCS       | 2.08  | HOSP DC | 0 | ##### | ##### | 2.08  |
| MB6B and ETU CCS       | 2.53  | DO6D    | 0 | ##### | ##### | 23.44 |
| MB6B and DO3D CCS      | 0.77  | DO3D    | 0 | ##### | ##### | 3.51  |
| MB6B and ETU CCS       | 2.43  | DO6D    | 0 | ##### | ##### | 3.46  |
| MB6B and ETU CCS       | 1.93  | JO3B    | 0 | ##### | ##### | 14.02 |
| MB6B and DIR_ADMIN CCS | 1.85  | DO5D    | 0 | ##### | ##### | 6.84  |
| MB6B and DIR_ADMIN CCS | 6.25  | HOSP DC | 1 | ##### | ##### | 6.25  |
| MB6B and ETU CCS       | 1.67  | DO3D    | 0 | ##### | ##### | 7.76  |
| MB6B and DIR_ADMIN CCS | 3.79  | DO6B    | 0 | ##### | ##### | 28.02 |
| MB6B and MB3C CCS      | 1.04  | DO6B    | 0 | ##### | ##### | 6     |
| MB6B and ETU CCS       | 0.52  | DO6B    | 0 | ##### | ##### | 3.36  |
| MB6B and MB5E CCS      | 0.9   | MB5E    | 0 | ##### | ##### | 17.27 |
| MB6B and ETU CCS       | 1.32  | DO3D    | 0 | ##### | ##### | 10.4  |
| MB6B and ETU CCS       | 4.27  | JO3B    | 0 | ##### | ##### | 11.06 |
| MB6B and ETU CCS       | 7.76  | MB6F    | 0 | ##### | ##### | 19.71 |
| MB6B and ETU CCS       | 0.52  | DO5D    | 0 | ##### | ##### | 3.58  |
| MB6B and DIR_ADMIN CCS | 1.74  | DO3D    | 0 | ##### | ##### | 3.87  |
| MB6B and ETU CCS       | 3.19  | JO3B    | 0 | ##### | ##### | 4.06  |
| MB6B and DIR_ADMIN CCS | 3.95  | DO6D    | 0 | ##### | ##### | 13.93 |
| MB6B and MB6F CCS      | 1.35  | MB6F    | 0 | ##### | ##### | 31.56 |
| MB6B and ETU CCS       | 15.42 | JO3G    | 0 | ##### | ##### | 37.2  |
| MB6B and DO6B CCS      | 0.83  | JO3B    | 0 | ##### | ##### | 2.58  |
| MB6B and ETU CCS       | 0.65  | JO3B    | 0 | ##### | ##### | 1.7   |
| MB6B and ETU CCS       | 2.03  | DO3D    | 0 | ##### | ##### | 3     |
| MB6B and ETU CCS       | 1.68  | JO3B    | 0 | ##### | ##### | 6.76  |
| MB6B and ETU CCS       | 1.01  | JO3B    | 0 | ##### | ##### | 9.15  |
| MB6B and ETU CCS       | 6.18  | HOSP DC | 1 | ##### | ##### | 6.18  |
| MB6B and ETU CCS       | 6.83  | JO3G    | 0 | ##### | ##### | 8.77  |
| MB6B and DIR_ADMIN CCS | 2.16  | DO6D    | 0 | ##### | ##### | 18.73 |
| MB6B and DIR_ADMIN CCS | 18.18 | JO3G    | 0 | ##### | ##### | 19.7  |
| MB6B and DIR_ADMIN CCS | 6.05  | DO3D    | 0 | ##### | ##### | 8.32  |
| MB6B and ETU CCS       | 1.78  | JO3G    | 0 | ##### | ##### | 15.72 |
| MB6B and ETU CCS       | 0.55  | MB5D    | 0 | ##### | ##### | 2.57  |
| MB6B and ETU CCS       | 1.99  | DO3D    | 0 | ##### | ##### | 6.16  |
| MB6B and ETU CCS       | 1.78  | JO3G    | 0 | ##### | ##### | 4.05  |
| MB6B and DIR_ADMIN CCS | 5.32  | MB5E    | 0 | ##### | ##### | 9.19  |
| MB6B and ETU CCS       | 1.77  | DO5D    | 0 | ##### | ##### | 3.88  |
| MB6B and ETU CCS       | 3.79  | HOSP DC | 1 | ##### | ##### | 3.79  |
| MB6B and ETU CCS       | 3.58  | JO3B    | 0 | ##### | ##### | 15.85 |

|                    |     |       |         |   |       |       |       |
|--------------------|-----|-------|---------|---|-------|-------|-------|
| MB6B and ETU       | CCS | 2.01  | JO3G    | 0 | ##### | ##### | 8.07  |
| MB6B and DO6D      | CCS | 10.41 | HOSP DC | 1 | ##### | ##### | 16.82 |
| MB6B and ETU       | CCS | 3.18  | DO5D    | 0 | ##### | ##### | 6.14  |
| MB6B and ETU       | CCS | 1.99  | ANES    | 0 | ##### | ##### | 68.85 |
| MB6B and FR5C      | CCS | 14.66 | MB6F    | 0 | ##### | ##### | 27.8  |
| MB6B and DIR_ADMI1 | CCS | 5.54  | DO6B    | 0 | ##### | ##### | 9.64  |
| MB6B and ETU       | CCS | 19.31 | DO6B    | 0 | ##### |       |       |
| MB6B and ETU       | CCS | 2.56  | DO3D    | 0 | ##### | ##### | 5.63  |
| MB6B and DIR_ADMI1 | CCS | 10.32 | MB6F    | 0 | ##### | ##### | 26.17 |
| MB6B and ETU       | CCS | 1.46  | JO3G    | 0 | ##### | ##### | 3.66  |
| MB6B and ETU       | CCS | 0.76  | JO3G    | 0 | ##### | ##### | 2.81  |
| MB6B and ETU       | CCS | 3.22  | JO3B    | 0 | ##### | ##### | 9.12  |
| MB6B and DIR_ADMI1 | CCS | 5.83  | HOSP DC | 1 | ##### | ##### | 5.83  |
| MB6B and DIR_ADMI1 | CCS | 6.04  | JO3B    | 0 | ##### | ##### | 14.04 |
| MB6B and DIR_ADMI1 | CCS | 0.92  | DO6D    | 0 | ##### | ##### | 5.11  |
| MB6B and ETU       | CCS | 1.44  | DO6D    | 0 | ##### | ##### | 5.54  |
| MB6B and ETU       | CCS | 0.99  | JO3B    | 0 | ##### | ##### | 2.88  |
| MB6B and DIR_ADMI1 | CCS | 2.04  | JO3G    | 0 | ##### | ##### | 5.8   |
| MB6B and MB7G      | CCS | 2.05  | MB5D    | 0 | ##### | ##### | 26.79 |
| MB6B and ETU       | CCS | 1.28  | DO3D    | 0 | ##### | ##### | 3.05  |
| MB6B and DIR_ADMI1 | CCS | 1.08  | DO3D    | 0 | ##### | ##### | 3.17  |
| MB6B and DIR_ADMI1 | CCS | 1.73  | JO3B    | 0 | ##### | ##### | 3.78  |
| MB6B and ETU       | CCS | 1.7   | DO5D    | 0 | ##### | ##### | 9.61  |
| MB6B and ETU       | CCS | 0.79  | MB4D    | 0 | ##### | ##### | 11.48 |
| MB6B and ETU       | CCS | 9.91  |         | 0 | ##### |       |       |
| MB6B and ETU       | CCS | 1.46  | DO2D    | 0 | ##### | ##### | 4.19  |
| MB6B and ETU       | CCS | 0.58  | JO3G    | 0 | ##### | ##### | 3.46  |
| MB6B and MB6G      |     |       |         | 2 | ##### |       |       |
| MB6B and ETU       | CCS | 0.4   | MB7G    | 0 | ##### | ##### | 1.06  |
| MB7B and FR1C      | GEN | 0.92  | FR1C    | 0 | ##### | ##### | 5.21  |
| MB6B and JO3G      | CCS | 3.71  |         | 0 | ##### |       |       |
| MB6B and DIR_ADMI1 |     |       |         | 2 | ##### |       |       |
| MB6B and ETU       | CCS | 1.55  |         | 0 | ##### |       |       |
| E103 and E PACU    | ORT | 1.8   | E082    | 0 | ##### | ##### | 8.18  |
| MB6B and DIR_ADMI1 | CCS | 2.71  | DO5D    | 0 | ##### | ##### | 17.55 |
| MB6B and ETU       | MED | 1.17  | DO6B    | 0 | ##### | ##### | 2.03  |
| MB6B and JO3B      | CCS | 2.42  | JO3B    | 0 | ##### | ##### | 7.43  |
| MB6B and ETU       | CCS | 0.38  | DO2D    | 0 | ##### | ##### | 6.28  |
| MB6B and ETU       | CCS | 1.71  | DO5D    | 0 | ##### | ##### | 4.49  |
| MB6B and DIR_ADMI1 |     |       |         | 2 | ##### |       |       |
| MB6B and MB6G      | CCS | 1.4   | JO3G    | 0 | ##### | ##### | 3.63  |
| MB6B and ETU       | FAM | 12.24 | DO2D    | 0 | ##### | ##### | 18.83 |
| MB6B and DO6D      | CCS | 0.21  | ANES    | 0 | ##### | ##### | 33.79 |
| MB8D and PACU      | NES | 0.68  | HOSP DC | 0 | ##### | ##### | 1.03  |
| MB6B and ER        |     | 0.63  | FLOOR   | 0 | ##### | ##### | 0.64  |

Hospital\_D Hospital\_D Apache3\_S Invasive\_V Invasive\_V Noninvasiv Noninvasiv Vent\_Days SOFA\_day1

|           |   |     |   |          |   |          |          |    |
|-----------|---|-----|---|----------|---|----------|----------|----|
| LTERM CAF | 0 | 73  | 0 | 0        | 0 | 0        | 0        | 6  |
| DEATH     | 1 | 110 | 0 | 0        | 0 | 0        | 0        | 11 |
| DEATH     | 1 | 123 | 0 | 0        | 1 | 0.718727 | 0.718727 | 13 |
| HOME      | 0 | 55  | 0 | 0        | 0 | 0        | 0        | 2  |
| DEATH     | 1 | 98  | 0 | 0        | 0 | 0        | 0        | 9  |
| DEATH     | 1 | 81  | 0 | 0        | 1 | 1.885417 | 1.885417 | 4  |
| ACUTE CAR | 0 | 107 | 0 | 0        | 1 | 0.197917 | 0.197917 | 10 |
| HOME      | 0 | 66  | 0 | 0        | 0 | 0        | 0        | 2  |
| LTERM CAF | 0 | 57  | 0 | 0        | 0 | 0        | 0        | 1  |
| HOME      | 0 | 47  | 0 | 0        | 0 | 0        | 0        | 3  |
| HOME      | 0 | 103 | 0 | 0        | 0 | 0        | 0        | 7  |
| HOME      | 0 | 113 | 0 | 0        | 0 | 0        | 0        | 8  |
| DEATH     | 1 | 86  | 1 | 1.885417 | 1 | 1.34375  | 3.229167 | 4  |
| LTERM CAF | 0 | 78  | 0 | 0        | 0 | 0        | 0        | 7  |
| DEATH     | 1 | 117 | 1 | 2.916667 | 0 | 0        | 2.916667 | 10 |
| REHAB     | 0 | 68  | 0 | 0        | 0 | 0        | 0        | 2  |
| HOME      | 0 | 88  | 1 | 0.197917 | 0 | 0        | 0.197917 | 4  |
| HOME      | 0 | 64  | 0 | 0        | 0 | 0        | 0        | 4  |
| HOME      | 0 | 70  | 0 | 0        | 1 | 0.260417 | 0.260417 | 6  |
| LTERM CAF | 0 | 83  | 1 | 2.213715 | 1 | 0.138194 | 2.35191  | 9  |
| LTERM CAF | 0 | 73  | 1 | 1.236111 | 1 | 3.652778 | 4.888889 | 6  |
| HOME      | 0 | 55  | 0 | 0        | 0 | 0        | 0        | 3  |
| HOME      | 0 | 62  | 0 | 0        | 0 | 0        | 0        | 8  |
| HOME      | 0 | 96  | 0 | 0        | 1 | 0.3      | 0.3      | 14 |
| LTERM CAF | 0 | 123 | 1 | 1.802083 | 0 | 0        | 1.802083 | 13 |
| ACUTE CAR | 0 | 111 | 1 | 1.34375  | 0 | 0        | 1.34375  | 12 |
| LTERM CAF | 0 | 158 | 1 | 6.062477 | 1 | 2.40625  | 8.468727 | 16 |
| HOME      | 0 | 59  | 0 | 0        | 0 | 0        | 0        | 3  |
| HOME      | 0 | 70  | 0 | 0        | 0 | 0        | 0        | 7  |
| HOME      | 0 | 44  | 1 | 0.642188 | 0 | 0        | 0.642188 | 6  |
| HOME      | 0 | 55  | 0 | 0        | 0 | 0        | 0        | 4  |
| HOME      | 0 | 64  | 0 | 0        | 0 | 0        | 0        | 2  |
| DEATH     | 1 | 88  | 0 | 0        | 1 | 1.052083 | 1.052083 | 4  |
| HOME      | 0 | 113 | 1 | 4.78125  | 1 | 0.125    | 4.90625  | 9  |
| DEATH     | 1 | 94  | 1 | 0.947917 | 0 | 0        | 0.947917 | 13 |
| DEATH     | 1 | 127 | 1 | 13.41664 | 1 | 0.229167 | 13.64581 | 12 |
| PSYCH     | 0 | 110 | 1 | 3.822917 | 1 | 1.270833 | 5.09375  | 15 |
| LTERM CAF | 0 | 57  | 0 | 0        | 1 | 0.427083 | 0.427083 | 3  |
| HOME      | 0 | 39  | 0 | 0        | 0 | 0        | 0        | 2  |
| LTERM CAF | 0 | 85  | 0 | 0        | 0 | 0        | 0        | 6  |
| HOME      | 0 | 61  | 0 | 0        | 0 | 0        | 0        | 7  |
| LTERM CAF | 0 | 84  | 0 | 0        | 0 | 0        | 0        | 8  |
| HOME      | 0 | 76  | 0 | 0        | 0 | 0        | 0        | 5  |
| DEATH     | 1 | 114 | 1 | 2.677083 | 0 | 0        | 2.677083 | 12 |
| HOME      | 0 | 53  | 0 | 0        | 0 | 0        | 0        | 9  |

|           |   |     |   |          |   |          |          |    |
|-----------|---|-----|---|----------|---|----------|----------|----|
| LTERM CAF | 0 | 93  | 0 | 0        | 1 | 1.010417 | 1.010417 | 7  |
| DEATH     | 1 | 148 | 1 | 6.926366 | 0 | 0        | 6.926366 | 17 |
| LTERM CAF | 0 | 98  | 1 | 1.614583 | 1 | 0.390162 | 2.004745 | 11 |
| REHAB     | 0 | 106 | 1 | 1.927083 | 0 | 0        | 1.927083 | 13 |
| LTERM CAF | 0 | 77  | 1 | 8.592361 | 1 | 4.520833 | 13.11319 | 8  |
|           | 0 | 97  | 1 | 4.21875  | 1 | 0.197917 | 4.416667 | 11 |
|           | 2 | 69  | 1 | 14.96873 | 1 | 0.229167 | 15.19789 | 12 |
|           | 0 | 92  | 0 | 0        | 0 | 0        |          | 9  |
|           | 0 | 109 | 1 | 5.298611 | 1 | 3.052083 | 8.350694 | 12 |
|           | 0 | 40  | 0 | 0        | 0 | 0        |          | 4  |
|           | 0 | 77  | 1 | 0.475694 | 0 | 0        | 0.475694 | 7  |
|           | 0 | 111 | 1 | 2.988866 | 0 | 0        | 2.988866 | 13 |
| DEATH     | 1 | 108 | 1 | 4.531227 | 1 | 0.395833 | 4.92706  | 10 |
|           | 0 | 69  | 1 | 4.947917 | 0 | 0        | 4.947917 | 13 |
|           | 0 | 52  | 0 | 0        | 0 | 0        |          | 5  |
|           | 0 | 56  | 0 | 0        | 0 | 0        |          | 8  |
|           | 0 | 65  | 0 | 0        | 0 | 0        |          | 2  |
|           | 0 | 63  | 1 | 0.941667 | 1 | 0.493866 | 1.435532 | 8  |
| DEATH     | 1 | 71  | 0 | 0        | 0 | 0        |          | 6  |
|           | 0 | 64  | 0 | 0        | 0 | 0        |          | 7  |
|           | 0 | 43  | 0 | 0        | 0 | 0        |          | 4  |
|           | 0 | 87  | 1 | 0.729167 | 0 | 0        | 0.729167 | 13 |
|           | 0 | 67  | 0 | 0        | 0 | 0        |          | 7  |
|           | 0 | 82  | 1 | 0.472222 | 0 | 0        | 0.472222 | 10 |
|           | 2 | 118 | 1 | 7.138843 | 1 | 0.21875  | 7.357593 | 15 |
|           | 0 | 73  | 0 | 0        | 0 | 0        |          | 4  |
|           | 0 | 85  | 0 | 0        | 0 | 0        |          | 6  |
|           | 2 | 58  |   |          |   |          |          |    |
| DEATH     | 1 | 118 | 1 | 0.291644 | 0 | 0        | 0.291644 | 17 |
| HOME      | 0 | 41  | 0 | 0        | 0 | 0        |          | 0  |
|           | 2 | 94  | 0 | 0        | 0 | 0        |          | 11 |
|           | 2 | 160 |   |          |   |          |          |    |
|           | 2 | 69  | 0 | 0        | 1 | 0.489583 | 0.489583 | 6  |
| LTERM CAF | 0 | 60  | 0 | 0        | 1 | 1.354514 | 1.354514 | 3  |
|           | 0 | 69  | 1 | 1.010394 | 0 | 0        | 1.010394 | 10 |
| HOME      | 0 | 69  | 0 | 0        | 0 | 0        |          | 5  |
|           | 0 | 62  | 0 | 0        | 0 | 0        |          | 8  |
| LTERM CAF | 0 | 71  | 0 | 0        | 0 | 0        |          | 1  |
| LTERM CAF | 0 | 174 | 0 | 0        | 0 | 0        |          | 4  |
|           | 2 | 42  |   |          |   |          |          |    |
|           | 0 | 57  | 0 | 0        | 0 | 0        |          | 5  |
|           | 0 | 60  | 1 | 8.15625  | 0 | 0        | 8.15625  | 9  |
|           | 0 | 71  | 0 | 0        | 0 | 0        |          | 7  |
|           | 0 | 75  | 0 | 0        | 0 | 0        |          | 1  |
| HOME      | 0 | 99  |   |          |   |          |          |    |



0 #####  
1 #####  
0 #####  
0 #####  
1 #####  
0 #####  
0 #####  
2  
2  
0 #####  
0 #####  
2  
1  
2  
2  
0 #####  
2  
0 #####  
2  
0 #####  
2  
0 #####  
0 #####  
0  
0 #####  
0 #####  
2  
2  
2  
0  
0 #####  
2  
0 #####  
0 #####  
0  
0 #####  
0  
0 #####  
0 #####  
2  
0  
0  
0  
0  
0 #####
